# Supplementary material
Source: PubMed Central journal article supplement (PMC6338568)
Supplement: Supp_Table1.pdf [file Supp_Table1.pdf]

## Supplementary Data

**Supplementary Table S1. Demographic Characteristic Comparison: The Analytic Sample (N = 3809) versus the Full Sample (N = 4897) with Identifiable Sex Information**

| Characteristic                                                 | Analytic sample (N = 3809) | Full sample (N = 4897) | p-Value     |
|----------------------------------------------------------------|----------------------------|------------------------|-------------|
| Race/ethnicity— <i>n</i> (%)                                   |                            |                        |             |
| White/other                                                    | 888 (23.31)                | 1227 (25.06)           | 0.06        |
| Hispanic                                                       | 1014 (26.62)               | 1340 (27.36)           | 0.44        |
| African American                                               | 1907 (50.07)               | 2330 (47.58)           | <b>0.02</b> |
| Mother's highest education— <i>n</i> (%)                       |                            |                        |             |
| College or some college                                        | 1292 (33.92)               | 1714 (35.00)           | 0.29        |
| High school or equivalent                                      | 1002 (26.31)               | 1239 (25.30)           | 0.29        |
| Less than high school                                          | 1515 (39.77)               | 1944 (39.70)           | 0.94        |
| Maternal marital status: married or cohabitating— <i>n</i> (%) | 1919 (50.38)               | 2553 (52.13)           | 0.10        |
| Receipt of public assistance— <i>n</i> (%)                     | 1551 (40.72)               | 1894 (38.68)           | 0.05        |
| Low birth weight— <i>n</i> (%)                                 | 369 (9.69)                 | 503 (10.27)            | 0.37        |
| Maternal BMI—kg/m <sup>2</sup> (±SE)                           | 29.56 (0.78)               | 29.35 (0.20)           | 0.17        |

The statistically significant results at an  $\alpha=0.05$  level are in bold.

SE, standard error.
