# Supplementary material
Source: PubMed Central journal article supplement (PMC6338568)
Supplement: Supp_Table2.pdf [file Supp_Table2.pdf]

## Supplementary Table S2. Growth Curve Model of BMI Percentile over Age 3, 5, and 9 Years, According to Individual Social Risk Factor at Age 1 and 3 Years Separately

|                                            | Initial BMIp <sup>a</sup> ( $\beta_{0i}$ ) (95% CI) <sup>c</sup> | Growth in BMIp <sup>b</sup> ( $\beta_{1j}$ ) (95% CI) <sup>c</sup> |
|--------------------------------------------|------------------------------------------------------------------|--------------------------------------------------------------------|
| <b>Girls</b>                               |                                                                  |                                                                    |
| Model 1: Food insecurity at year 1         | 7.34 (−1.23 to 15.90)                                            | −1.71 (−4.64 to 1.22)                                              |
| Model 2: Housing insecurity at year 1      | 2.01 (−2.18 to 6.21)                                             | −0.23 (−1.69 to 1.22)                                              |
| Model 3: Maternal IPV at year 1            | 0.12 (−5.48 to 5.71)                                             | −0.55 (−2.48 to 1.38)                                              |
| Model 4: Maternal depression at year 1     | 0.72 (−4.54 to 5.97)                                             | <b>−2.20 (−4.03 to −0.37)</b>                                      |
| Model 5: Maternal substance use at year 1  | 2.23 (−3.51 to 7.97)                                             | −0.82 (−2.80 to 1.15)                                              |
| Model 6: Paternal incarceration at year 1  | −0.51 (−9.10 to 8.08)                                            | −2.13 (−5.00 to 0.74)                                              |
| Model 7: Food insecurity at year 3         | −0.32 (−3.73 to 3.08)                                            | −1.91 (−10.60 to 6.77)                                             |
| Model 8: Housing insecurity at year 3      | −1.69 (−5.86 to 2.49)                                            | 0.89 (−0.58 to 2.36)                                               |
| Model 9: Maternal IPV at year 3            | −1.17 (−7.00 to 4.66)                                            | −1.46 (−3.52 to 0.61)                                              |
| Model 10: Maternal depression at year 3    | 1.92 (−2.81 to 6.65)                                             | −0.59 (−2.23 to 1.06)                                              |
| Model 11: Maternal substance use at year 3 | 1.93 (−3.68 to 7.54)                                             | −0.39 (−2.36 to 1.59)                                              |
| Model 12: Paternal incarceration at year 3 | −5.17 (−12.59 to 2.25)                                           | 0.54 (−1.98 to 3.06)                                               |
| Model 11: Child abuse at year 3            | −1.07 (−4.69 to 2.55)                                            | 0.65 (−0.63 to 1.93)                                               |
| Model 12: Child neglect at year 3          | 2.15 (−6.05 to 10.35)                                            | 0.06 (−2.83 to 2.94)                                               |
| <b>Boys</b>                                |                                                                  |                                                                    |
| Model 1: Food insecurity at year 1         | −1.63 (−8.63 to 5.38)                                            | −0.61 (−3.21 to 2.00)                                              |
| Model 2: Housing insecurity at year 1      | −2.07 (−5.96 to 1.82)                                            | 0.05 (−1.39 to 1.50)                                               |
| Model 3: Maternal IPV at year 1            | −3.70 (−9.07 to 1.67)                                            | 0.41 (−1.58 to 2.40)                                               |
| Model 4: Maternal depression at year 1     | −0.65 (−5.42 to 4.11)                                            | 0.67 (−1.10 to 2.44)                                               |
| Model 5: Maternal substance use at year 1  | 0.86 (−4.75 to 6.47)                                             | −1.67 (−3.72 to 0.39)                                              |
| Model 6: Paternal incarceration at year 1  | 0.67 (−6.99 to 8.33)                                             | −0.97 (−3.79 to 1.85)                                              |
| Model 7: Food insecurity at year 3         | −1.70 (−4.41 to 1.00)                                            | −4.90 (−12.85 to 3.05)                                             |
| Model 8: Housing insecurity at year 3      | −3.33 (−7.26 to 0.59)                                            | −0.28 (−1.75 to 1.19)                                              |
| Model 9: Maternal IPV at year 3            | −1.45 (−6.52 to 3.62)                                            | 0.00 (−1.90 to 1.89)                                               |
| Model 10: Maternal depression at year 3    | −3.50 (−7.81 to 0.81)                                            | 0.65 (−0.94 to 2.24)                                               |
| Model 11: Maternal substance use at year 3 | 4.17 (−1.22 to 9.56)                                             | −1.02 (−3.00 to 0.96)                                              |
| Model 12: Paternal incarceration at year 3 | −6.02 (−12.36 to 0.32)                                           | 0.46 (−1.89 to 2.80)                                               |
| Model 13: Child abuse at year 3            | 1.06 (−2.51 to 4.63)                                             | −0.32 (−1.65 to 1.00)                                              |
| Model 14: Child neglect at year 3          | 3.77 (−3.05 to 10.59)                                            | −1.03 (−3.54 to 1.48)                                              |

The statistically significant results at an  $\alpha=0.05$  level are in bold.

<sup>a</sup>BMIp at age 3 years.

<sup>b</sup>In the unit of 2 years.

<sup>c</sup>Adjusted for race/ethnicity, maternal education, maternal marital status, receipt of public assistance, low birth weight, and maternal BMI. CI, confidence interval.
