# Supplementary material
Source: PubMed Central journal article supplement (PMC6338568)
Supplement: Supp_Table3.pdf [file Supp_Table3.pdf]

**Supplementary Table S3. Growth Curve Model of BMI Percentile over Age 3, 5, and 9 Years, According to Sum of Social Risk Score at Age 1 and 3 Years Separately**

|                                                                 | <b>Initial BMI<sup>a</sup> (<math>\beta_{0i}</math>) (95% CI)<sup>c</sup></b> | <b>Growth in BMI<sup>b</sup> (<math>\beta_{1j}</math>) (95% CI)<sup>c</sup></b> |
|-----------------------------------------------------------------|-------------------------------------------------------------------------------|---------------------------------------------------------------------------------|
| <b>Girls</b>                                                    |                                                                               |                                                                                 |
| Model 1: Cumulative social risk at year 1                       | 0.93 (−0.49 to 2.36)                                                          | −0.44 (−0.97 to 0.08)                                                           |
| Model 2: Cumulative social risk at year 3                       | 0.16 (−1.11 to 1.44)                                                          | −0.31 (−0.73 to 0.11)                                                           |
| Model 3: Cumulative social risk at year 1 and year 3 separately |                                                                               |                                                                                 |
| Cumulative social risk at year 1                                | 0.98 (−0.57 to 2.54)                                                          | −0.35 (−0.93 to 0.23)                                                           |
| Cumulative social risk at year 3                                | −0.12 (−1.51 to 1.27)                                                         | −0.21 (−0.67 to 0.25)                                                           |
| <b>Boys</b>                                                     |                                                                               |                                                                                 |
| Model 1: Cumulative social risk at year 1                       | −1.21 (−3.50 to 1.09)                                                         | 0.23 (−0.61 to 1.07)                                                            |
| Model 2: Cumulative social risk at year 3                       | 0.25 (−1.62 to 2.11)                                                          | −0.47 (−1.16 to 0.22)                                                           |
| Model 3: Cumulative social risk at year 1 and year 3 separately |                                                                               |                                                                                 |
| Cumulative social risk at year 1                                | −1.38 (−3.75 to 1.00)                                                         | 0.40 (−0.46 to 1.27)                                                            |
| Cumulative social risk at year 3                                | 0.54 (−1.39 to 2.47)                                                          | −0.55 (−1.27 to 0.16)                                                           |

The statistically significant results at an  $\alpha = 0.05$  level are in bold.

<sup>a</sup>BMI<sub>p</sub> at age 3 years.

<sup>b</sup>In the unit of 2 years.

<sup>c</sup>Adjusted for race/ethnicity, maternal education, maternal marital status, receipt of public assistance, low birth weight, and maternal BMI.
