# Supplementary material
Source: PubMed Central journal article supplement (PMC6338568)
Supplement: Supp_Table4-6.pdf [file Supp_Table4-6.pdf]

**Supplementary Table S4. Linear Mixed Model of BMI Percentile over Age 3, 5, and 9 Years, According to Sum of Social Risk Score at Age 1 and 3 Years**

|                                     | Initial BMIp <sup>a</sup> ( $\beta_{0i}$ ) (95% CI) <sup>c</sup> | Growth in BMIp <sup>b</sup> ( $\beta_{1i}$ ) (95% CI) <sup>c</sup> |
|-------------------------------------|------------------------------------------------------------------|--------------------------------------------------------------------|
| Girls                               |                                                                  |                                                                    |
| Cumulative social risk              |                                                                  |                                                                    |
| Cumulative social risk (0)          | Ref.                                                             | Ref.                                                               |
| Cumulative social risk (1)          | -0.11 (-3.99 to 3.77)                                            | -0.34 (-1.83 to 1.16)                                              |
| Cumulative social risk (2)          | -1.62 (-5.62 to 2.39)                                            | -0.05 (-1.48 to 1.37)                                              |
| Cumulative social risk (3)          | 2.04 (-3.05 to 7.13)                                             | 0.85 (-1.03 to 2.72)                                               |
| Cumulative social risk ( $\geq 4$ ) | 0.83 (-3.61 to 5.27)                                             | <b>-1.76 (-3.38 to -0.14)</b>                                      |
| Boys                                |                                                                  |                                                                    |
| Cumulative social risk              |                                                                  |                                                                    |
| Cumulative social risk (0)          | Ref.                                                             | Ref.                                                               |
| Cumulative social risk (1)          | 0.45 (-2.71 to 3.60)                                             | -0.25 (-1.43 to 0.93)                                              |
| Cumulative social risk (2)          | 0.06 (-3.92 to 4.03)                                             | -0.91 (-2.30 to 0.47)                                              |
| Cumulative social risk (3)          | 0.20 (-4.19 to 4.60)                                             | -0.79 (-2.36 to 0.78)                                              |
| Cumulative social risk ( $\geq 4$ ) | -1.17 (-6.31 to 3.98)                                            | -0.79 (-2.56 to 0.99)                                              |

The statistically significant results at an  $\alpha=0.05$  level are in bold.

<sup>a</sup>BMIp at age 3 years.

<sup>b</sup>In the unit of 2 years.

<sup>c</sup>Adjusted for race/ethnicity, maternal education, maternal marital status, receipt of public assistance, low birth weight, and maternal BMI.

**Supplementary Table S5. Linear Mixed Model of BMI Percentile over Age 3, 5, and 9 Years, According to Sum of Social Risk Score at Age 1 and 3 Years, Using Six Social Risk Factors at Both Age 1 and 3 Years**

|                                     | Initial BMIp <sup>a</sup> ( $\beta_{0i}$ ) (95% CI) <sup>c</sup> | Growth in BMIp <sup>b</sup> ( $\beta_{1i}$ ) (95% CI) <sup>c</sup> |
|-------------------------------------|------------------------------------------------------------------|--------------------------------------------------------------------|
| Girls                               |                                                                  |                                                                    |
| Cumulative social risk              |                                                                  |                                                                    |
| Cumulative social risk (0)          | Ref.                                                             | Ref.                                                               |
| Cumulative social risk (1)          | −1.76 (−6.15 to 2.63)                                            | 0.52 (−1.03 to 2.06)                                               |
| Cumulative social risk (2–3)        | 1.01 (−3.49 to 5.52)                                             | 0.55 (−1.03 to 2.12)                                               |
| Cumulative social risk ( $\geq 4$ ) | 0.94 (−5.43 to 7.32)                                             | −1.68 (−3.89 to 0.52)                                              |
| Boys                                |                                                                  |                                                                    |
| Cumulative social risk              |                                                                  |                                                                    |
| Cumulative social risk (0)          | Ref.                                                             | Ref.                                                               |
| Cumulative social risk (1)          | −2.59 (−6.89 to 1.70)                                            | −0.05 (−1.63 to 1.53)                                              |
| Cumulative social risk (2–3)        | −1.73 (−5.95 to 2.50)                                            | −0.63 (−2.17 to 0.92)                                              |
| Cumulative social risk ( $\geq 4$ ) | −5.23 (−10.98 to 0.51)                                           | 0.17 (−1.96 to 2.30)                                               |

The statistically significant results at an  $\alpha = 0.05$  level are in bold.

<sup>a</sup>BMIp at age 3 years.

<sup>b</sup>In the unit of 2 years.

<sup>c</sup>Adjusted for race/ethnicity, maternal education, maternal marital status, receipt of public assistance, low birth weight, and maternal BMI.

**Supplementary Table S6. Growth Curve Model of BMI Percentile over Age 3, 5, and 9 Years, According to High Cumulative Social Risk ( $\geq 2$  Social Factors) at Age 1 and/or 3 Years, Using Six Social Risk Factors at Both Age 1 and 3 Years**

|                                          | Initial BMI <sup>a</sup> ( $\beta_{0i}$ ) (95% CI) <sup>c</sup> | Growth in BMI <sup>b</sup> ( $\beta_{1i}$ ) (95% CI) <sup>c</sup> |
|------------------------------------------|-----------------------------------------------------------------|-------------------------------------------------------------------|
| Girls                                    |                                                                 |                                                                   |
| High cumulative social risk ( $\geq 2$ ) |                                                                 |                                                                   |
| Both age 1 and 3 years                   | −2.02 (−9.29 to 5.26)                                           | −0.79 (−3.32 to 1.75)                                             |
| Age 3 years only                         | −0.60 (−6.30 to 5.10)                                           | 0.92 (−1.09 to 2.94)                                              |
| Age 1 year only                          | 5.19 (−0.79 to 11.17)                                           | −0.75 (−2.83 to 1.33)                                             |
| Neither age 1 nor 3 years                | Ref.                                                            | Ref.                                                              |
| Boys                                     |                                                                 |                                                                   |
| High cumulative social risk ( $\geq 2$ ) |                                                                 |                                                                   |
| Both age 1 and 3 years                   | −2.98 (−9.43 to 3.46)                                           | 0.87 (−1.52 to 3.25)                                              |
| Age 3 years only                         | 0.19 (−4.88 to 5.27)                                            | −0.89 (−2.78 to 1.01)                                             |
| Age 1 year only                          | 1.43 (−4.21 to 7.07)                                            | −0.77 (−2.84 to 1.29)                                             |
| Neither age 1 nor 3 years                | Ref.                                                            | Ref.                                                              |

Note. The statistically significant results at an  $\alpha=0.05$  level are in bold.

<sup>a</sup>BMI<sup>a</sup> at age 3 years.

<sup>b</sup>In the unit of 2 years.

<sup>c</sup>Adjusted for race/ethnicity, maternal education, maternal marital status, receipt of public assistance, low birth weight, and maternal BMI.
